# Supplementary material for: The protist Trichomonas vaginalis harbors multiple lineages of transcriptionally active Mutator-like elements
Source: PubMed Central journal article supplement (PMC2725143; doi:10.1186/1471-2164-10-330), 2009-07-21

A

|                               |                                         |
|-------------------------------|-----------------------------------------|
| Facid_48851616:217-252        | DGIKLNLDDEEVMEDYPRSEFQLQTIHYARGLKSNVRE  |
| Ccell_27881402:228-263        | DKCLGMLSEVNEVFPPEAKYQRQTVHFYRNI FSVTPR  |
| Efaec_29377857:233-268        | DAHKGLVSAIRKSFNTNVSWQRQVHFRLNIFTTIPK    |
| Sepid_13383310:233-268        | DAHKGLVSAIRKSFNTNVSWQRQVHFRLNIFTTIPK    |
| Mmaze_21228632:242-277        | DGHKGIQKAVRESFIGSSWQMOHVHLIRQALKKVQK    |
| Blinc_6456721:243-278         | DAHSGIKAAVKAILPGAGWQRQVHFARNVTQRLGS     |
| Mtube_15610776_233-268        | DQHAGLVKALKRCFQAGHQRCVHFARNLLAHVPK      |
| Maviu_4210728:232-267         | DAHTGLRSAIEAILIGASWQRQVHFRLNVLAQVPK     |
| Ehist_284.m00070:394-429      | DRCIAQYNALKLLFPYSKLFFORIHIDERSLKKYFK    |
| Ehist_c000407510:200-235      | DRCIAQYNALKLLFPYSKLFFORIHIDERSLKKYFK    |
| Ehist_c000407727:200-235      | DRCIAQYNALKLLFPYSKLFFORIHIDERSLKKYFK    |
| Edisp_167379831:282-317       | DRSIAQYNALKHVFPHSKLFFORIHIDERSLIKYFKS   |
| Emosh_004g04.q1k:61-96        | DRSNAQFRAIQTVFPNSEIIFOKVHIQRSIEKYFHN    |
| Emosh_010h03.plk:98-133       | DRSNAQFRAIQTVFPNSEIIFOKVHIQRSIEKYFHN    |
| Emosh_13lh06.q1k:214-249      | DRSNAQFRAIQTVFPNSEIIFOKVHIQRSIEKYFHN    |
| Emosh_117b06.plk:146-181      | DRSNAQFRAIQTVFPNSEIIFOKVHIQRSIEKYFHN    |
| EMULE_Eil:279-314             | DRCLSQTNALLVQVKDYNLVFOTRHIDRRNLITEFGK   |
| Einva_035b12.q1k:154-189      | DRCFSQTKALETSONGISIFHCVRHIDRRDLQVAFGK   |
| Hop_30421204:298-333          | DRCLACMNAVSSCFPGSALFLCLWHINKAVQSYCRP    |
| Cglob_11619630:301-336        | DRCIACMNAVSTCFPSAASLLCLWHINKAILRHCQP    |
| Mtrun_124361025:272-307       | DRDMSLMKAVAHVFPESYALNCFHFVQANVKQRCVL    |
| Cneof_58264436:296-331        | DRDPALINALMSVLPKAYRFSQFVHILQENVKSNI RP  |
| Ptrit_189208826:332-367       | DHDRSLKAGLSVIFPGIPQRRCIMHIIYQNVQTEAVK   |
| Zmays_19908843:325-360        | DQDPAMPIALRTVFPKTVHRLCLWHVQNR FMPFLNE   |
| Osati_50904427:646-681        | DQDLAMRAAIRQVFPNSKHRNCLFHLI LKKCRERSGN  |
| Athal_5764395:341-376         | DQDKFLMSAVSELLPNTRHCFALWHVLEKIPEYFSH    |
| Vvini_157338603:444-479       | DQDKALKEATAEVPFESRHCFLWHILSKIPEKLS C    |
| Jittery_7673677:310-345       | DEDASIKSAIRTTLPDTIHLRCLMWHIMEKVSEKVG H  |
| Osati_50931191:1,002-1,037    | DEDASMKAAIAQILPNTVHRLCLMWHIMEKVPEKVG P  |
| MURAZC_23928448:166-201       | DACKGLKVMAMNVFPHAEKRECFRHLIQNYIKLFGG    |
| Mudra_540581:393-428          | DAQKGLMHAVNEVFPYAEERECFRHLMGNYVKHHAG    |
| Osati_37700327:544-579        | DKQKGLIPAVQQLFPDSEHRFCVRHLYQN FQFSFKG   |
| Osati_34914922:481-516        | DKQKGLIPAVKKVFPDTEHRFCVRHLYSNFQEFKG     |
| <b>TvMULE1: 340-375</b>       | DQGPALIAAVRESGFS CDHKFCLRHFATKREYIN VY  |
| Athal_11994228:486-521        | DRNSSLIKAVAEVFPSSSHGNCVYHLSQNVRTKVAY    |
| Athal_8777291:593-628         | DRHESI KVGVKVFPQAHHGACI IHLCRNIQARFKN   |
| Athal_15225608:540-575        | DRHNSVYASIRKVYPMSSHAACVWHIKRNIEASFKY    |
| Athal_22331509:653-688        | DRNQSI FKVWSLVFNQAHHGACLVHIDRRNVKGRYVI  |
| Athal_15224361:640-675        | DRHSSIIYKGVSVVYPKANHGACIVHIDERNISVSYAR  |
| Athal_4220448:592-627         | DRHSSIIYKGLSVVY PRAHHGACAVHIDERNLSTYYGK |
| <b>Calbi_68474652:182-217</b> | DADPAEISGIQSIKDKTKIVLCYFHVLRAVTIK LKE   |
| <b>Calbi_68466277:370-405</b> | DCSMPELSAIKTVFPPESSVSIKWHILRNVRTEARS    |
| <b>Calbi_68466572:112-147</b> | DCSMSELSAIKTVFPPESSVSIKWHILRNVRTEARS    |
| <b>TvMULE2: 262-297</b>       | DCALNIARAIEDGFPLAQLSWCAVHVL RACAKVGSY   |
| <b>TvMULE3: 52-87</b>         | DCAQEIENAIINSFPEVILHWCAVHVMRAFRKNLKD    |
| <b>TvMULE4: 255-290</b>       | DCAPQITNAVETAIPLCQIIWCGVHVLRAVMRKA EK   |

B

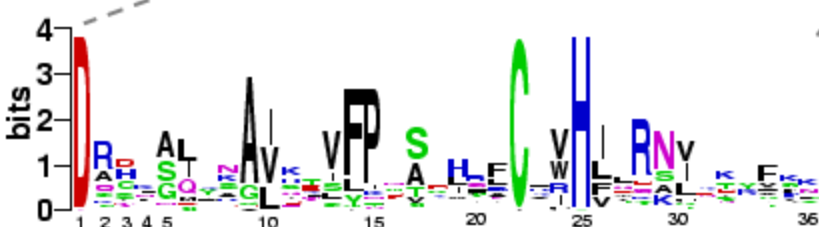

Supplement: 1471-2164-10-330-S1.pdf [file 1471-2164-10-330-S1.pdf]
