# Supplementary material for: The protist Trichomonas vaginalis harbors multiple lineages of transcriptionally active Mutator-like elements
Source: PubMed Central journal article supplement (PMC2725143; doi:10.1186/1471-2164-10-330), 2009-07-21

Continued

|                    |                              | 70          | 80                | 90               | 100              | 110               | 120     |
|--------------------|------------------------------|-------------|-------------------|------------------|------------------|-------------------|---------|
| <b>IS256</b>       | Facidarmanus_48851616        | -RGLK-----  | EPLLIIVADG        | IKNLDE-EVM--     | EIYPRSEFQLCT     | IHYARGLKSNVRE     |         |
|                    | Ccellulolyticum_27881402     | -RGLD-----  | GVKLIVGDKCL       | GMLE-SVN--       | EVFPPEAKYQRCT    | VHFYRNIFSVTPR     |         |
|                    | Mmazei_Gol_21228632          | -RGLR-----  | GVKLIVSDGHK       | GIQK-AVR--       | ESFIGSSWQMCH     | VHLIRQALKKVVQK    |         |
|                    | Mtuberculosis_H37Rv_15610776 | -RGLG-----  | GVRLVISDQHAG      | LVK-ALK--        | RCFQAGHQRCRV     | HVFARNLLAHVPK     |         |
|                    | Blinens_6456721              | -RGLKVSTETD | PEGVALVISDAH      | SGIKA-AVK--      | AILPGAGWQRCRV    | HVFARNVTQRLGS     |         |
|                    | Mavium_4210728               | -RGLS-----  | GVQLVISDAHT       | GLRS-AIE--       | AILIGASWQRCRV    | HFLRNVLAQVPK      |         |
|                    | Efaecalis_V583_29377857      | -RGLQ-----  | GTELVISDAHK       | GLVS-AIR--       | KSFTNVSWQRCQV    | HFLRNIFTTIPK      |         |
|                    | Sepidermidis_13383310        | -RGLQ-----  | GTELVISDAHK       | GLVS-AIR--       | KSFTNVSWQRCQV    | HFLRNIFTTIPK      |         |
|                    | Ehistolytica_284.m00070      | -NILNY----- | TPQIIIVCDR        | CIAQYN-ALK--     | LLFPYSKLF        | FCRIHIERSLKKYFKN  |         |
|                    | Ehistolytica_2390555_c407510 | -NILNY----- | TPQIIIVCDR        | CIAQYN-ALK--     | LLFPYSKLF        | FCRIHIERSLKKYFKN  |         |
| <b>EMULEs</b>      | Ehistolytica_2390555_c407727 | -NILNY----- | TPQIIIVCDR        | CIAQYN-ALK--     | LLFPYSKLF        | FCRIHIERSLKKYFKN  |         |
|                    | Edispar_167379831            | -NILNY----- | GPEIIVCDR         | SIAQYN-ALK--     | HVFPYSKLF        | FCRIHIERSLIKYFKS  |         |
|                    | Emoshkovskii_mosh131h06.q1k  | -EYLN-----  | SPDIIICDR         | SNAQFR-AIQ--     | TVFPNSEIIF       | CKVHIQRSIEKYFHN   |         |
|                    | Emoshkovskii_mosh010h03.plk  | -EYLN-----  | SPDIIICDR         | SNAQFR-AIQ--     | TVFPNSEIIF       | CKVHIQRSIEKYFHN   |         |
|                    | Emoshkovskii_mosh117b06.plk  | -EYLN-----  | SPDIIICDR         | SNAQFR-AIQ--     | TVFPNSEIIF       | CKVHIQRSIEKYFHN   |         |
|                    | Emoshkovskii_mosh004g04.q1k  | -EYLN-----  | SPDIIICDR         | SNAQFR-AIQ--     | TVFPNSEIIF       | CKVHIQRSIEKYFHN   |         |
|                    | Einvadens_EMULE_Ei1          | -KFYD-----  | LTVVICDR          | CLSQTN-ALL--     | QVFKDVNLVFC      | TRHIRRNLIITEFGK   |         |
|                    | Einvadens_inv035b12.q1k      | -KKVN-----  | LTSVYCDR          | CFSQTK-ALE--     | TSFNGISIFHC      | VRHIRRDLQVAFGK    |         |
|                    | Foxysporum_30421204_Hop78    | -SVYEDH---  | NIGLPSVILT        | DRCLACMN-AVS--   | SCFPGSALFL       | CLWHINKAVQSYCRP   |         |
|                    | Ylipolitica_50553866_Mutyl   | -VFLQKY---  | LIPDPGVIL         | SD-CAPAIKKG      | HKY--SELNGSNL    | KLCLWHAAKAVERKGS- |         |
| <b>Hop/Jittery</b> | Zmays_19908843               | -TCMG-----  | SEGPRVMLT         | DQDPAMPI-ALR--   | TVFPKTVHRL       | CLWHVQNRFPFLNE    |         |
|                    | Osativa_50904427             | -TAMG-----  | GKHPETIIT         | DQDLAMRA-AIR--   | QVFPNSKHRN       | CLFHILKKCRERSGN   |         |
|                    | Athaliana_5764395            | -RAMG-----  | GRAPKVILT         | DQDKFLMS-AVS--   | ELLPNTRHCF       | FALWHVLEKIPEYFSH  |         |
|                    | Zmays_7673677_Jittery        | -VAMG-----  | GKAPRLIIT         | DEDASIKS-AIR--   | TTLPDTIHR        | LCMWHIMEKVSSEKVGH |         |
|                    | Osativa_50931191             | -KATG-----  | GVAPRLIIT         | DEDASMKA-AIA--   | QILPNTVHRL       | CMWHIMEKVPSEKVG   |         |
|                    | Cglobosum_116196930          | -SLYEVC---  | NARTPSVVL         | TDRCIACMN-AVS--  | TCFPSAASLL       | CLWHANKAILRHQC    |         |
|                    | Mtruncatula_124361025        | -KLLSS---   | KMNMPKVIV         | TDRDMSLMK-AVA--  | HVFPESYALN       | CFFHVQANVKQRCVL   |         |
|                    | Cneoformans_58264436         | -ELVG-----  | KPDV-KVVI         | TDRDPALIN-ALM--  | SVLPKAYRF        | SCFWHLQENVKSNI    |         |
|                    | Ptritici_189208826           | -ELFDYL---  | SVS-PKCF          | LTDHDRSLKA-GLS-- | VIFPGIPQ         | RRCIWHIYQNVQTEAVK |         |
|                    | Vvinifera_157338603          | -RAMG-----  | GQAPRVILT         | DQDKALKE-AIA--   | EVFPESRHCF       | CLWHILSKIPEKLS    |         |
| <b>MuDR</b>        | VVGDL-----                   | PLLALCS     | DACKGLKN-AMN--    | NVFPHA           | EKRECFRHLIQNYIKL | FGG               |         |
|                    | VVGDM-----                   | TLLAICS     | DAQGLMH-AVN--     | EVFPYA           | ERRECFRHLMGNYV   | KHHAG             |         |
|                    | GIDNT-----                   | YPWTIMT     | NKQKGLIP-AVK--    | KVFPDTE          | HRFCVHRHLYSN     | FQEKFKG           |         |
|                    | GIVNT-----                   | YPWTIMT     | DKQKGLIP-AVQ--    | QLFPDSE          | HRFCVHRHLYSN     | FQEQSFKG          |         |
|                    | IADS-----                    | NLTILS      | DRHESIKV-GVK--    | KVFPQA           | HHGACIHLCRNI     | QARFKN            |         |
|                    | AIPDD-----                   | PELVFV      | DRHNSVYA-SIR--    | KVYPMSS          | HAACVVHLKRN      | IEASFYK           |         |
|                    | IIKDG-----                   | PDLTFV      | SDRNQSIFK-VVS--   | LVFNQA           | HHGACLVHIRRN     | VKGRYVI           |         |
|                    | IVPDT-----                   | DDLMI       | VSDRHSSYK-GVS--   | VVYPKAN          | HGACIVHLERN      | ISVSYAR           |         |
|                    | VIPDS-----                   | TELVF       | MSDRNSSLIK-AVA--  | EVYPSSH          | HGNCVYHLSQN      | VRTKVAY           |         |
|                    | IVQDS-----                   | DDLIV       | SDRHSSYK-GLS--    | VVYPRA           | HHGACAVHLERN     | LSTYYGK           |         |
| <b>TvCaMULEs</b>   | LIGPN-----                   | REVCIIS     | DRHPGILN-SIIHIMPH | HLTIHHRW         | CMRH-----        |                   |         |
|                    | FIPPS-----                   | RFKNIYS     | DQGPATIA-AVR--    | ESGF             | SCDHKFC          | LRFHATKREYINVY    |         |
|                    | -HSVT-----                   | LKQVM       | IDCSMPELS-AIK--   | TVFP             | ESSVSICKWYILRN   | VNRTEARS          |         |
|                    | -HSVT-----                   | PKQVM       | IDCSMSELS-AIK--   | TVFP             | ESSVSICKWHILRN   | VNRTEARS          |         |
|                    | -TEFG-----                   | INPTQ       | FVIDADPAEIS-GIQ-- | SIFK             | DTKIVLCYFHL      | RAVTIKLKE         |         |
|                    | -AHLD-----                   | PQHWS       | ADCALNIAR-AIE--   | DGF              | PLAQLSWCAVH      | LRACAKVGSY        |         |
|                    | -AKVK-----                   | PKYF        | MSDCAQEIEN-AII--  | NSF              | PEVILHWC         | CAVHVMRAF         | RKLNKLD |
|                    | -INRE-----                   | PSYF        | SMDCAPQITN-AVE--  | TAI              | PLCOI            | IWCGVHLRAV        | MKA     |
|                    |                              |             |                   |                  |                  |                   | EK      |

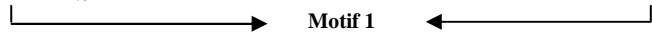

Supplement: 1471-2164-10-330-S3.pdf [file 1471-2164-10-330-S3.pdf]
