# Supplementary material for: The protist Trichomonas vaginalis harbors multiple lineages of transcriptionally active Mutator-like elements
Source: PubMed Central journal article supplement (PMC2725143; doi:10.1186/1471-2164-10-330), 2009-07-21

Combined block diagrams: non-overlapping sites with p-value < 0.0001

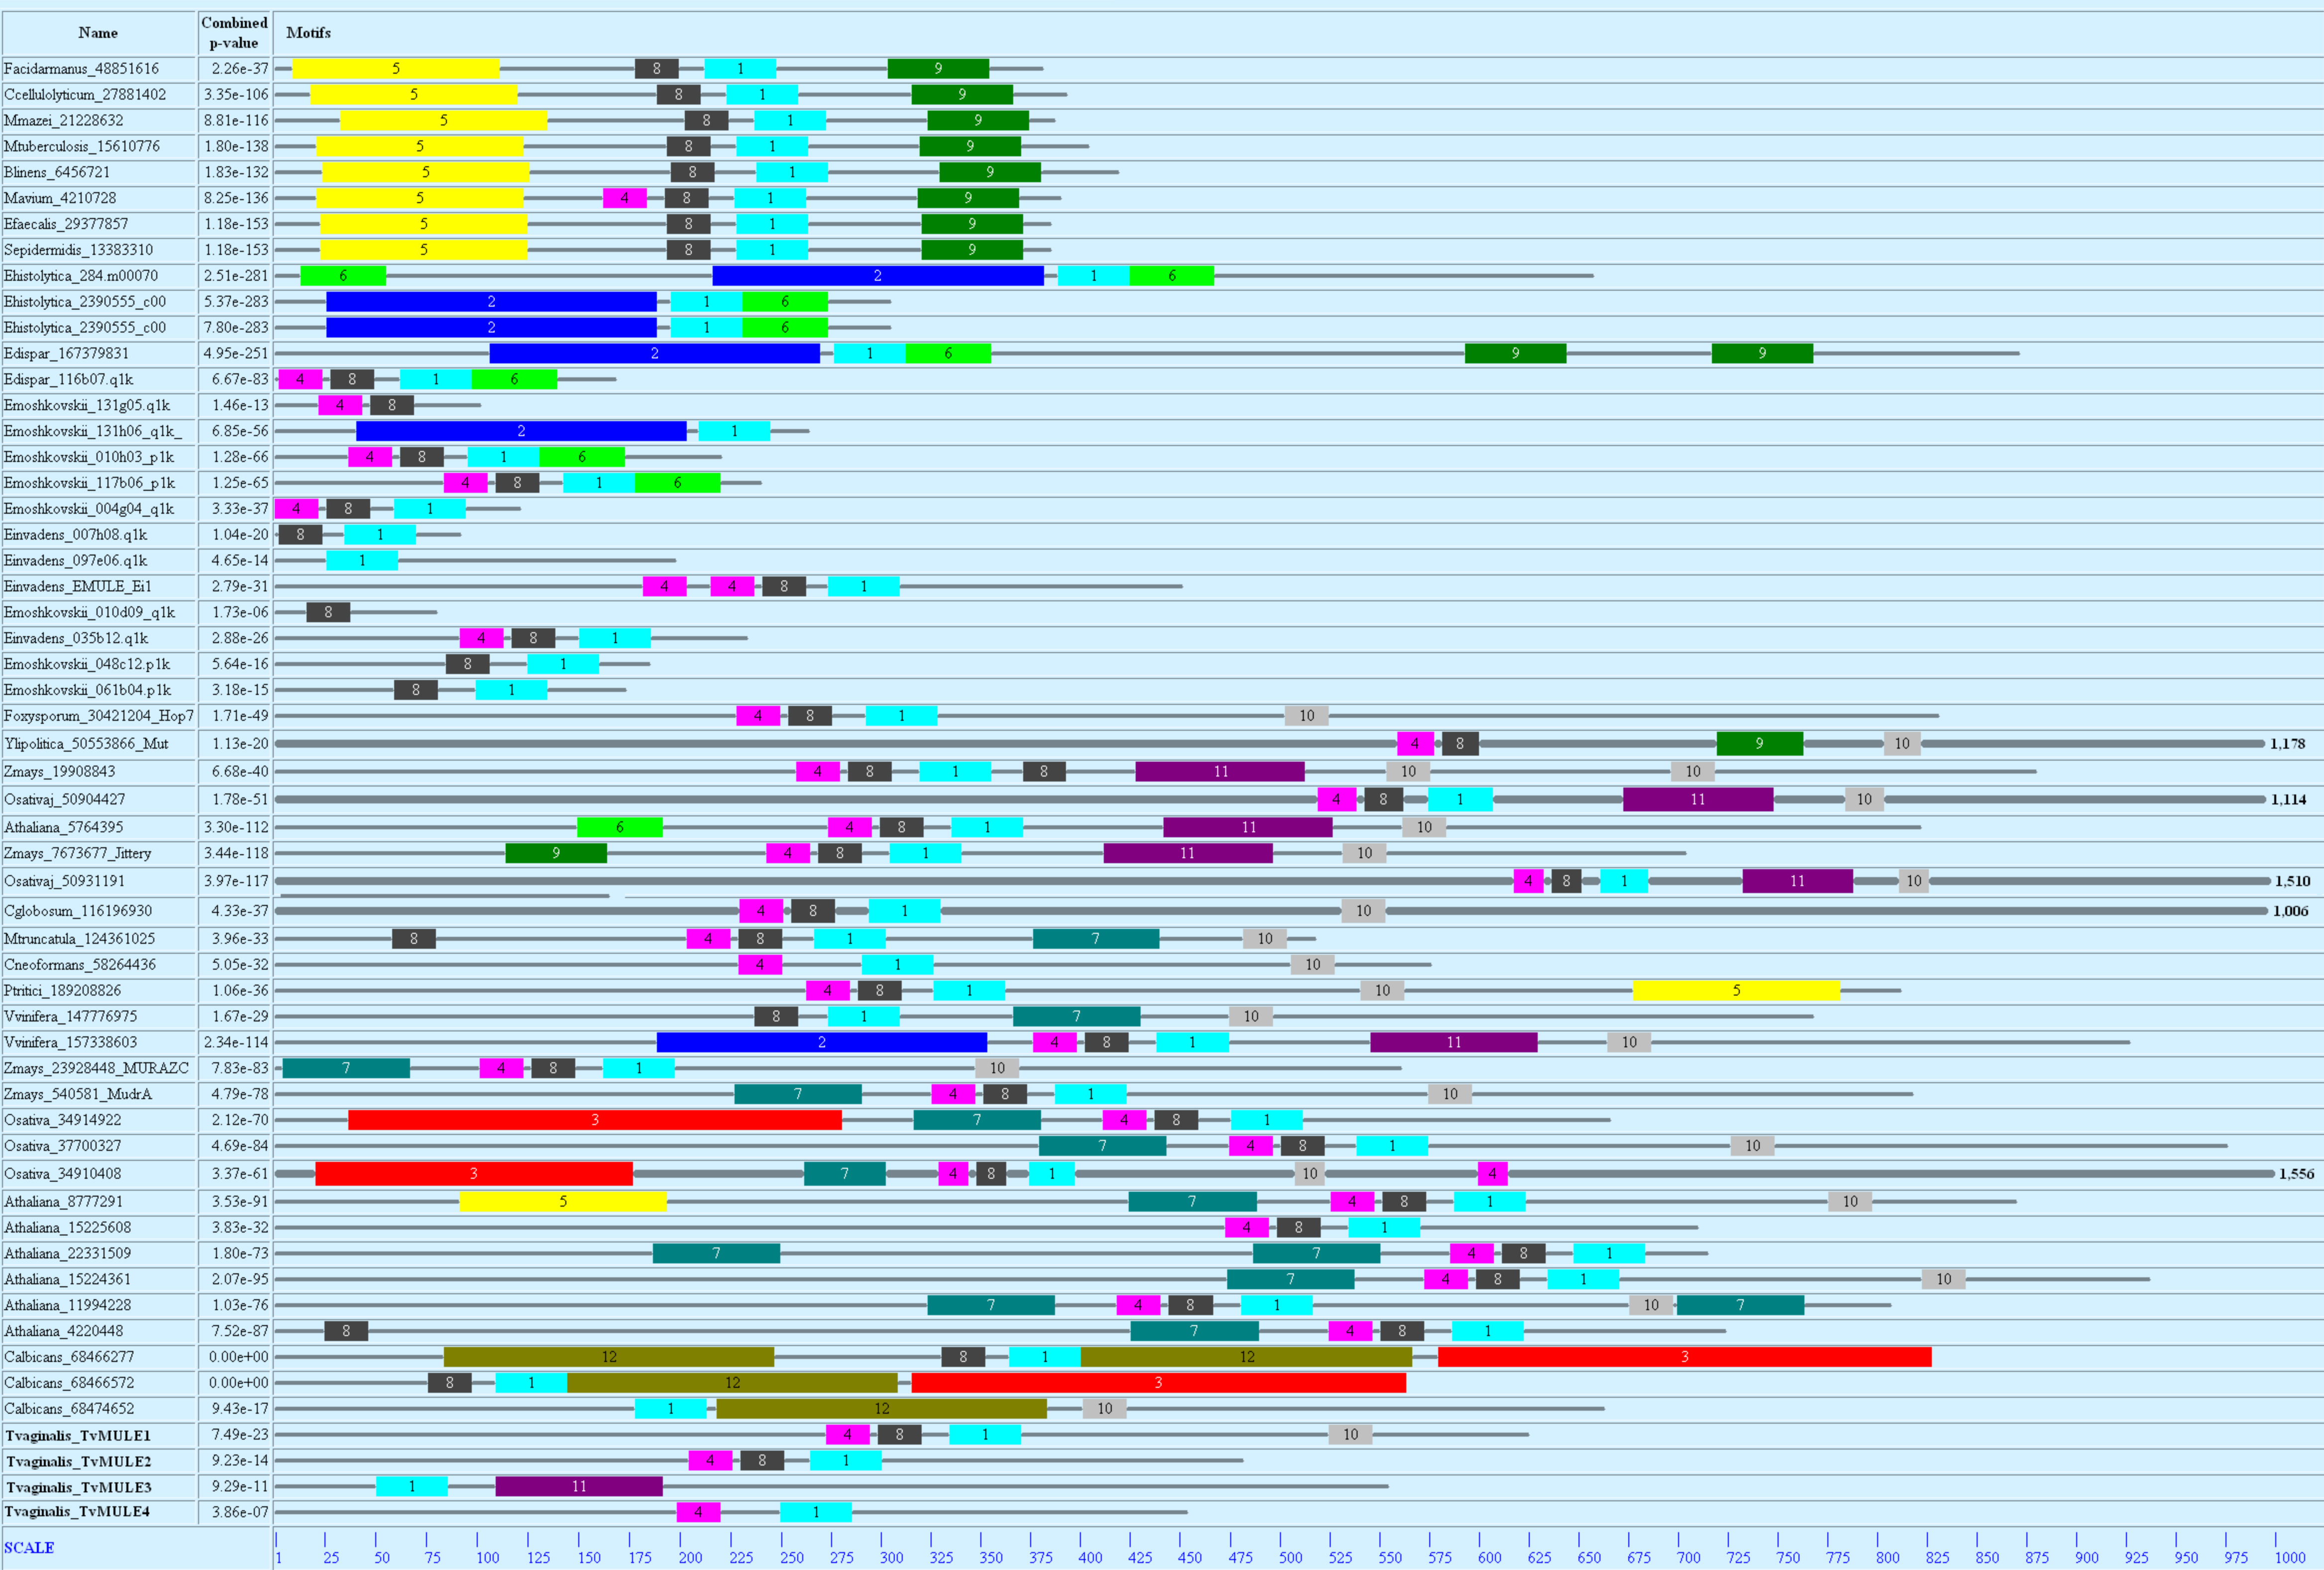

Supplement: 1471-2164-10-330-S2.pdf [file 1471-2164-10-330-S2.pdf]
